# Supplementary material for: Endoscopic placement of covered versus uncovered self-expandable metal stents for palliation of malignant gastric outlet obstruction
Source: HighWire-hosted journal article supplement (doi:10.1136/gutjnl-2020-320775), 2020-11-22
Supplement: gutjnl-2020-320775supp001_data_supplement.pdf [file gutjnl-2020-320775supp001_data_supplement.pdf]

**Supplementary Table 1. List of participating institutions**

|    | Institutions                               |
|----|--------------------------------------------|
| 1  | Kindai University                          |
| 2  | Osaka Medical College                      |
| 3  | Osaka Saiseikai Nakatsu Hospital           |
| 4  | Shimane University Hospital                |
| 5  | Japanese Red Cross Wakayama Medical Center |
| 6  | Okayama University                         |
| 7  | Kawasaki Medical School                    |
| 8  | Kurashiki Central Hospital                 |
| 9  | Bell Land General Hospital                 |
| 10 | Kurume University                          |
| 11 | Kobe University                            |
| 12 | Kyoto Katsura Hospital                     |
| 13 | Matsue Red Cross Hospital                  |
| 14 | JA Hiroshima General Hospital              |
| 15 | Toyonaka Municipal Hospital                |
| 16 | Shiga University of Medical Science        |
| 17 | Kitano Hospital                            |
| 18 | Shikoku Cancer Center                      |
| 19 | Fukuoka University Chikushi Hospital       |
| 20 | Kyoto University                           |
| 21 | Japanese Red Cross Osaka Hospital          |
| 22 | Tottori University                         |

---

|    |                                                     |
|----|-----------------------------------------------------|
| 23 | Wakayama Medical University                         |
| 24 | Osaka City General Hospital                         |
| 25 | Kishiwada Tokushukai Hospital                       |
| 26 | Shinbeppu Hospital                                  |
| 27 | Kagawa University                                   |
| 28 | Japanese Red Cross Kyoto Daini Hospital             |
| 29 | Tottori Municipal Hospital                          |
| 30 | Kita-Harima Medical Center                          |
| 31 | Social Media Corporation Tenyoukai Central Hospital |
| 32 | Tottori Red Cross Hospital                          |
| 33 | Kagoshima University                                |
| 34 | Oita Sanai Medical Center                           |
| 35 | Hiroshima University Hospital                       |
| 36 | Onomichi General Hospital                           |
| 37 | Hiroshima City Hospital                             |
| 38 | Tenri Hospital                                      |
| 39 | Imakiire General Hospital                           |
| 40 | Hyogo Prefectural Awaji Medical Center              |
| 41 | Nara Medical University                             |

---

**Supplementary Table 2. Stent dysfunction by comparison of stenotic site (duodenal vs. gastric stenosis) between the CSEMS and UCSEMS groups**

|                           | CSEMS     | UCSEMS    | <i>p</i> |
|---------------------------|-----------|-----------|----------|
| Duodenal stenosis         | n = 119   | n = 125   |          |
| Overall stent dysfunction | 38 (31.9) | 24 (19.2) | 0.02     |
| Stent ingrowth            | 6 (5.0)   | 8 (6.4)   | 0.65     |
| Stent overgrowth          | 9 (7.6)   | 4 (3.2)   | 0.22     |
| Stent migration           | 15 (12.6) | 4 (3.2)   | 0.01     |
| Other                     | 8 (6.7)   | 8 (6.4)   | 0.92     |
| Gastric stenosis          | n = 63    | n = 59    |          |
| Overall stent dysfunction | 26 (41.3) | 19 (32.2) | 0.30     |
| Stent ingrowth            | 0 (0.0)   | 15 (25.4) | <0.01    |
| Stent overgrowth          | 3 (4.8)   | 0 (0.0)   | 0.09     |
| Stent migration           | 7 (11.1)  | 0 (0.0)   | 0.02     |
| Other                     | 16 (25.4) | 4 (6.8)   | 0.01     |

Data are presented as n (%).

CSEMS, covered self-expandable metal stent; UCSEMS, uncovered self-expandable metal stent.
