# Supplementary figures and images for: Endoscopic placement of covered versus uncovered self-expandable metal stents for palliation of malignant gastric outlet obstruction
Source: HighWire-hosted journal article supplement (doi:10.1136/gutjnl-2020-320775), 2020-11-22

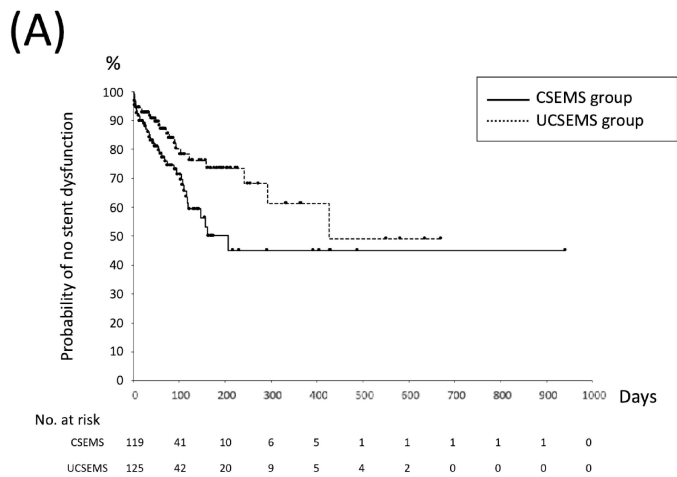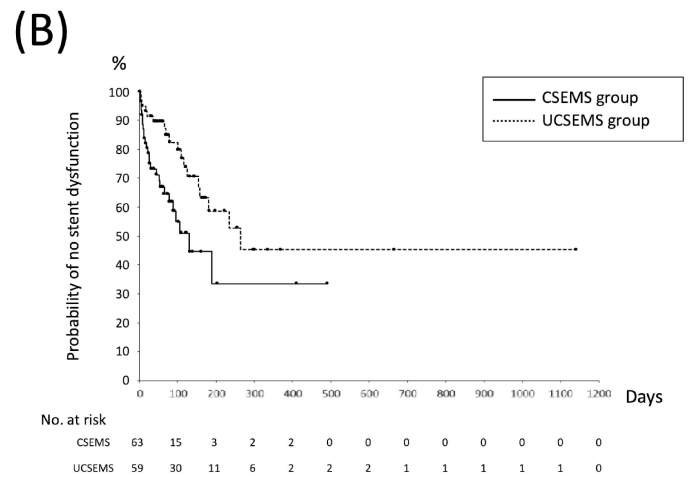

Supplement: gutjnl-2020-320775supp002_data_supplement.pdf [file gutjnl-2020-320775supp002_data_supplement.pdf]

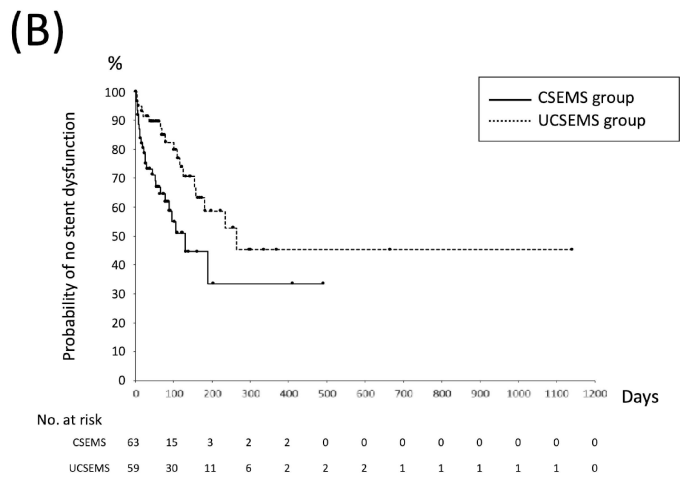

Supplement: gutjnl-2020-320775supp002_data_supplement.pdf [file gutjnl-2020-320775supp002_data_supplement.pdf]
